# Supplementary material for: Detailed redox mechanism and self-discharge diagnostic of 4.9 V LiMn1.5Ni0.5O4 spinel cathode revealed by Raman spectroscopy
Source: Royal Society of Chemistry journal article supplement (doi:10.1039/d1ta00989c), 2021-01-01
Supplement: d1ta00989c1.pdf [file d1ta00989c1.pdf]

# Detailed Redox Mechanism and Self-Discharge Diagnostic of 4.9 V $\text{LiMn}_{1.5}\text{Ni}_{0.5}\text{O}_4$ Spinel Cathode revealed by Raman Spectroscopy

Ankush Bhatia,<sup>\*a</sup> Yosra Dridi Zrelli,<sup>a</sup> Jean Pierre Pereira-Ramos,<sup>a,†</sup> and Rita Baddour-Hadjean,<sup>\*a</sup>

<sup>a</sup>Institut de Chimie et des Matériaux Paris-Est, UMR 7182 CNRS-UPEC  
2, rue Henri Dunant, F-94320, Thiais, France

<sup>†</sup>ORCID ID 0000-0001-5381-900X

\*Corresponding authors: [baddour@icmpe.cnrs.fr](mailto:baddour@icmpe.cnrs.fr), ORCID ID 0000-0002-3158-1851  
[bhatia@icmpe.cnrs.fr](mailto:bhatia@icmpe.cnrs.fr), ORCID ID 0000-0002-5291-4379

**Figure S1.** Structure of spinel  $Fd\bar{3}m$  LMNO (Ni/Mn, O and Li atoms are shown in grey, red and green colour respectively).

**Figure S2.** XRD pattern of LMNO in the 42-54° 2 $\theta$  region. Bragg lines marked by green star correspond to impurity peaks. Experimental data shown in red line and calculated pattern in black solid line.

**Figure S3.** Expected evolution of the  $\text{Ni}^{2+}$ ,  $\text{Ni}^{3+}$  and  $\text{Ni}^{4+}$  ratio (indicated by blue, green and red dashed lines, respectively). Estimated  $\text{Ni}^{2+}/\text{Ni}^{3+}/\text{Ni}^{4+}$  relative amounts as a function of x in  $\text{L}_{1-x}\text{NMO}$  electrodes obtained from Raman spectra fittings (indicated by blue circles, green squares and red diamonds, respectively). The error bars correspond to statistical error of the deconvolution procedure.

**Table S1.** Structural parameters obtained from Rietveld refinement of LMNO diffraction pattern

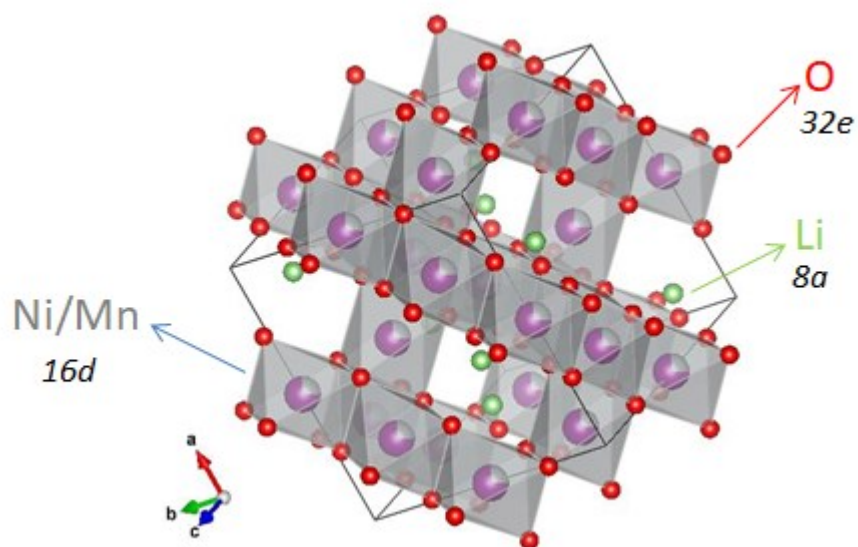

**Figure S1.** Structure of spinel  $Fd\bar{3}m$  LMNO (Ni/Mn, O and Li atoms are shown in grey, red and green colour respectively)

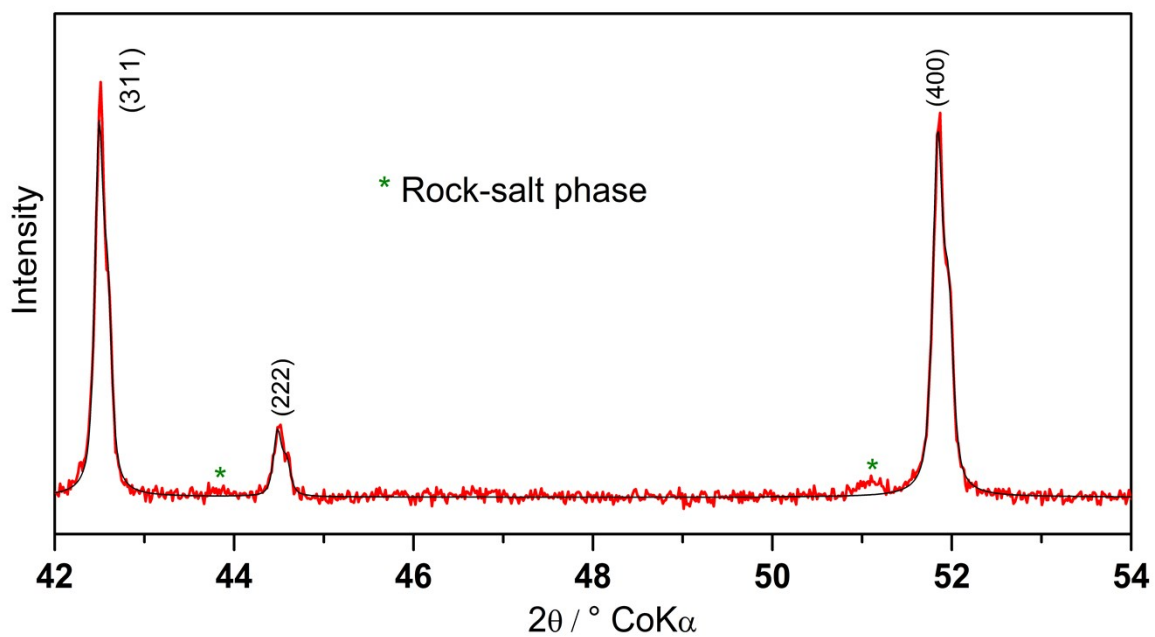

**Figure S2.** XRD pattern of LMNO in the 42-54°  $2\theta$  region. Bragg lines marked by green star correspond to impurity peaks. Experimental data shown in red line and calculated pattern in black solid line.

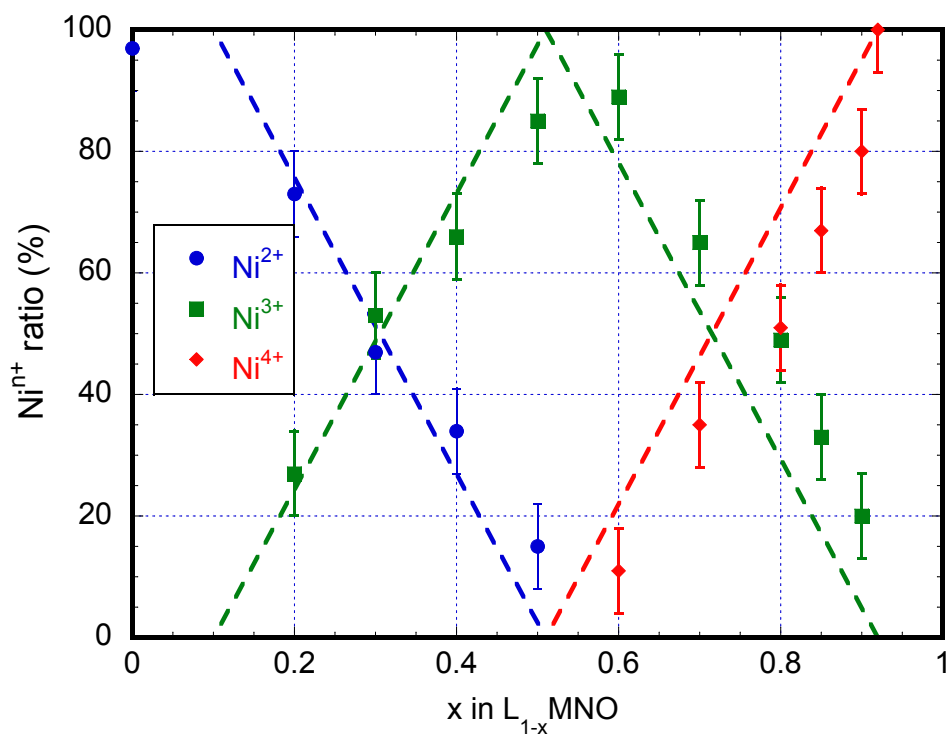

**Figure S3.** Expected evolution of the Ni<sup>2+</sup>, Ni<sup>3+</sup> and Ni<sup>4+</sup> ratio (indicated by blue, green and red dashed lines, respectively). Estimated Ni<sup>2+</sup>/Ni<sup>3+</sup>/Ni<sup>4+</sup> relative amounts as a function of x in L<sub>1-x</sub>NMO electrodes obtained from Raman spectra fittings (indicated by blue circles, green squares and red diamonds, respectively). The error bars correspond to statistical error of the deconvolution procedure.

| Atom                   | Wyckoff position | x      | y      | z      |
|------------------------|------------------|--------|--------|--------|
| Fractional Coordinates |                  |        |        |        |
| Li                     | 8a               | 0.125  | 0.125  | 0.125  |
| Ni                     | 16d              | 0.5    | 0.5    | 0.5    |
| Mn                     | 16d              | 0.5    | 0.5    | 0.5    |
| O                      | 32e              | 0.2600 | 0.2600 | 0.2600 |

**Table S1.** Structural parameters obtained from Rietveld refinement of LMNO diffraction pattern
